# Supplementary material for: Phytochemical Composition and Antioxidant Activity of Various Extracts of Fibre Hemp (Cannabis sativa L.) Cultivated in Lithuania
Source: MDPI journal article supplement (doi:10.3390/molecules28134928), 2023-06-22
Supplement: s1 [file s1]

# Phytochemical composition and antioxidant activity of various extracts of fibre hemp (*Cannabis sativa* L.) cultivated in Lithuania

Asta Judžentienė, Rasa Garjonytė and Jurga Būdienė

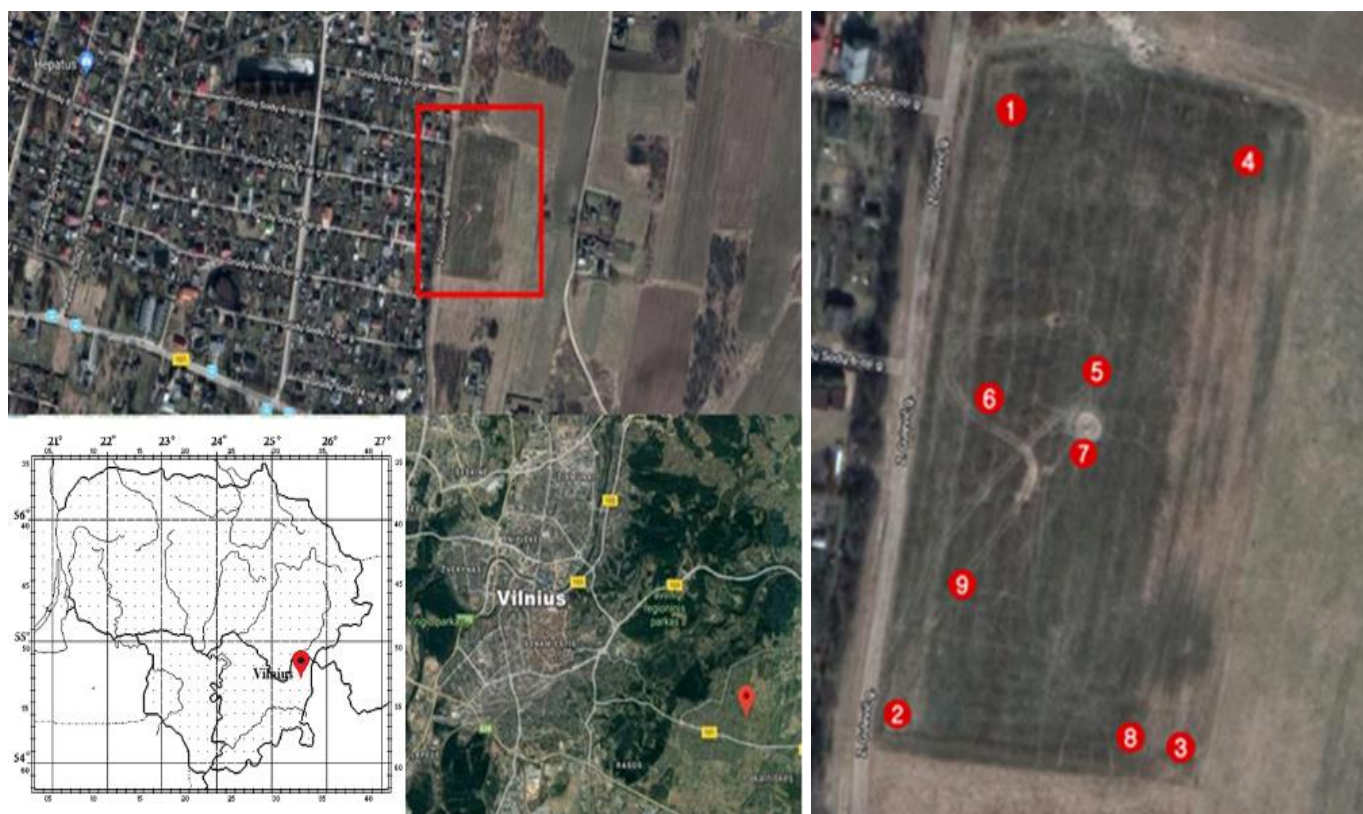

**Figure S1.** Geographical indication of fibre hemp cultivated field and sampling sites (Pavilnys, Vilnius, Lithuania: 54°39'45.7"N 25°22'14.6"E).

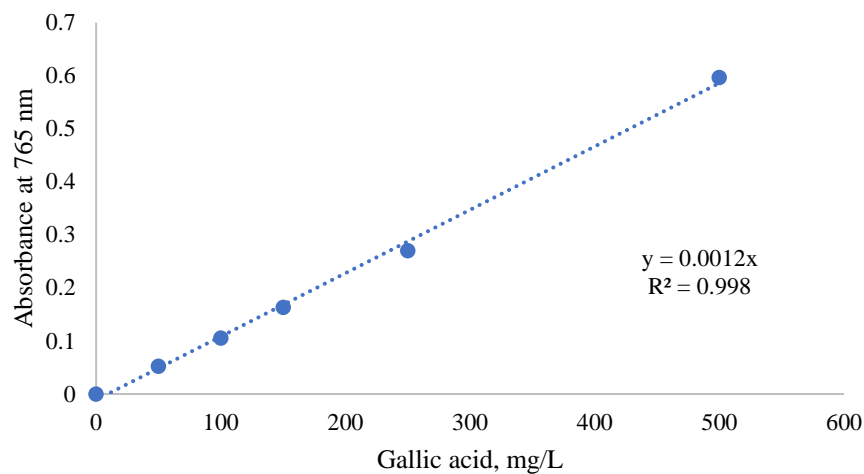

**Figure S2.** Gallic acid standard calibration curve (Folin–Ciocalteu method).

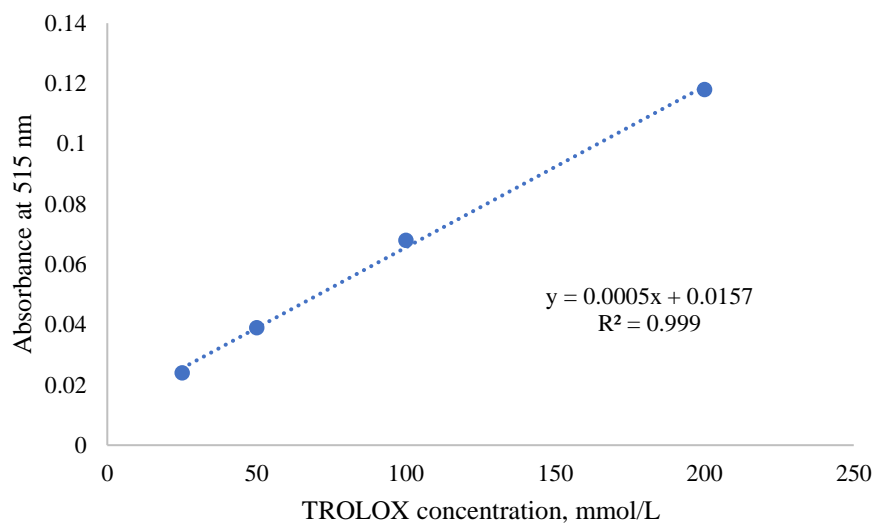

**Figure S3.** TROLOX standard calibration curve.
